# Supplementary material for: Melatonin Decreases Acute Inflammatory Response to Neural Probe Insertion
Source: MDPI journal article supplement (doi:10.3390/antiox11081628), 2022-08-22
Supplement: s1 [file s1]

Supplementary Materials

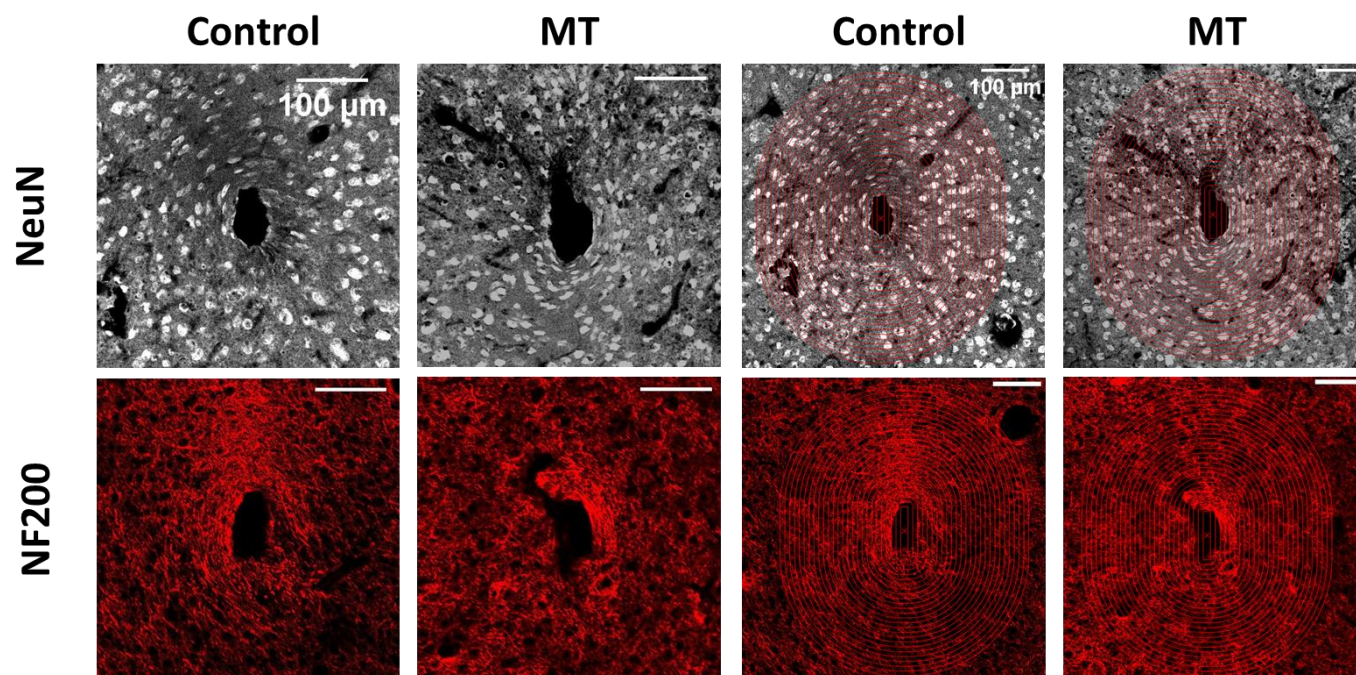

**Figure S1.** Zoomed and binned representative images for NeuN and NF200 from main document for reference. Bins (red concentric ovals) are 10  $\mu\text{m}$  wide and each image contains 25 bins total. Center bin is marked with an x to indicate that it is not considered in the intensity analysis.

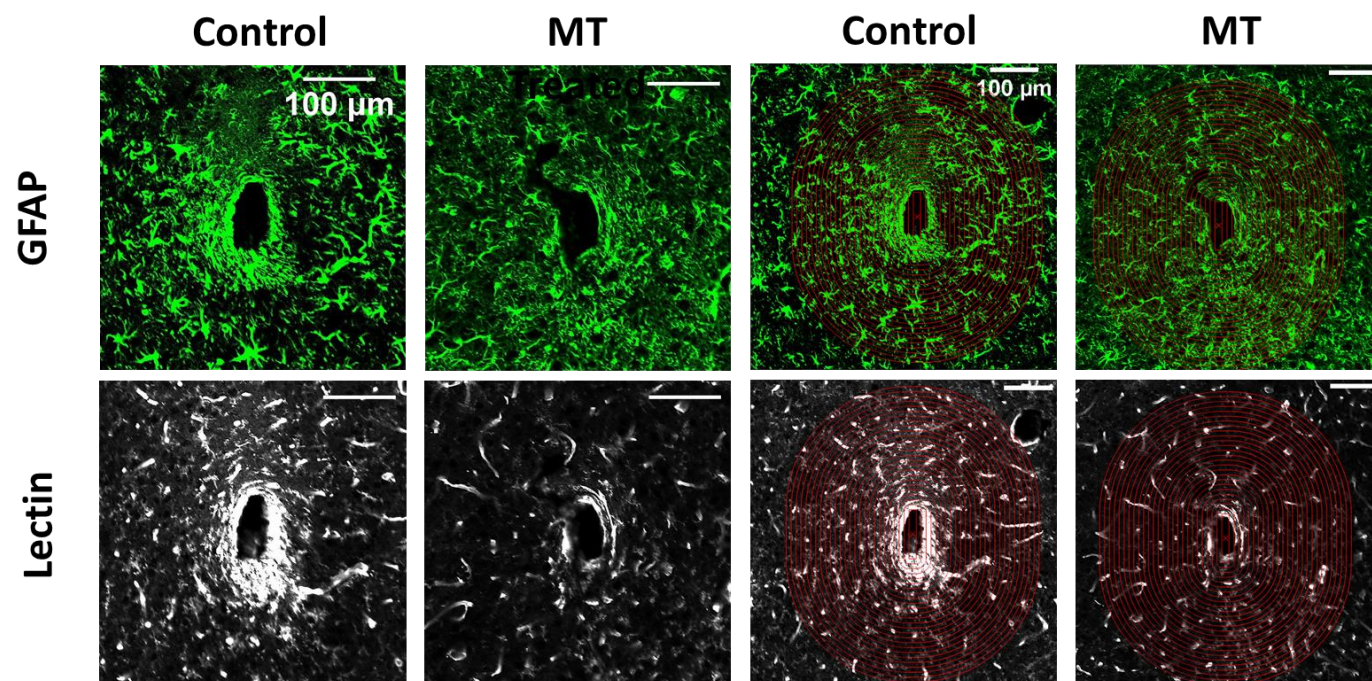

**Figure S2.** Zoomed and binned representative images for GFAP and tomato lectin from main document for reference. Bins (red concentric ovals) are 10  $\mu\text{m}$  wide and each image contains 25 bins total. Center bin is marked with an x to indicate that it is not considered in the intensity analysis.
